# Supplementary material
Source: Research Square preprint supplement (doi:10.21203/rs.3.rs-9735895/v1)
Supplement: Supplementary file 1 [file d95ea143ff7ba05308354c6c.docx]

**Dear: Editor of** [**[Journal of Water Conservation Science and Engineering](https://www.sciencedirect.com/journal/journal-of-water-process-engineering" \o "Go to Journal of Water Process Engineering on ScienceDirect)**](https://www.springer.com/journal/13762/?sap-outbound-id=88C36494A6D78A706BA39E0982C711393F9B974E&utm_source=automation&utm_medium=email&utm_campaign=000_JBS9530_0000025089_CONR_JRNLS_CON1_GL_MPAS_APSPR_ACTV_RC_3&utm_content=EN_46762_20230525&mkt-key=42010A0D55441EECA9DB6CE9040C360D)

There is not Conflict of Interest

With best regards

Prof. Z. M. Omara
